# Supplementary material for: Natural Extracts Mitigate the Deleterious Effects of Prolonged Intense Physical Exercise on the Cardiovascular and Muscular Systems
Source: MDPI journal article supplement (doi:10.3390/antiox12071474), 2023-07-22
Supplement: s1 [file s1]

Supplemental Figure S1

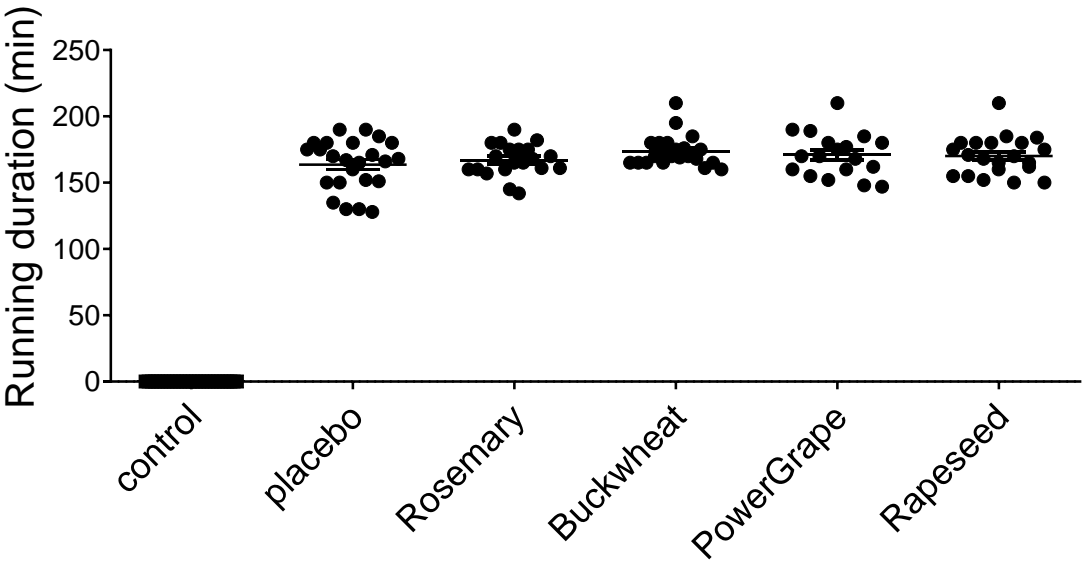

## Supplemental Figure S2

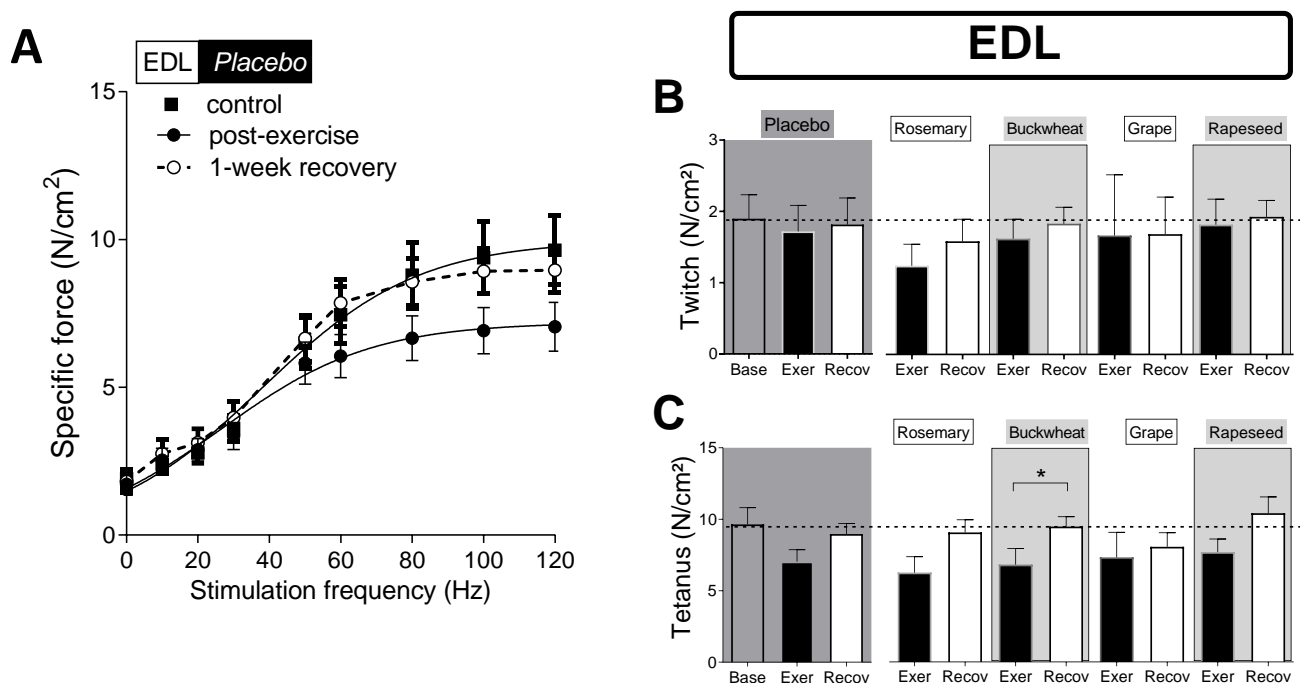

**Figure S2. Effects of the 4 different natural extracts on the isometric strength of EDL after exhausting exercise and one week of recovery. (A)** Force–frequency relationships of EDL muscles measured *in vitro* from Sedentary (black square), 30 min post-exercise (black circle) and after one week of recovery (open circle, dash line) placebo groups. Results are expressed as mean  $\pm$  SEM, ( $n=10-13$  animals/group). \* $P < 0.05$  Placebo post-exercise vs Basal. **(B-C)** reveal the different contractile characteristics measured *in vitro* of the EDL muscles in groups of animals fed with the 4 different natural extracts (Rosemary, Buckwheat, Powergrape and Rapeseed) either just post-exercise or one- week later. **B** represent the force induced by a single twitch, and **C** represent the tetanic contraction or peak specific force. Results are expressed as mean  $\pm$ SEM, ( $n=7-13$  in each group). \$  $P < 0.05$  vs basal, \* $P < 0.05$  Recovery vs Post-exercise.

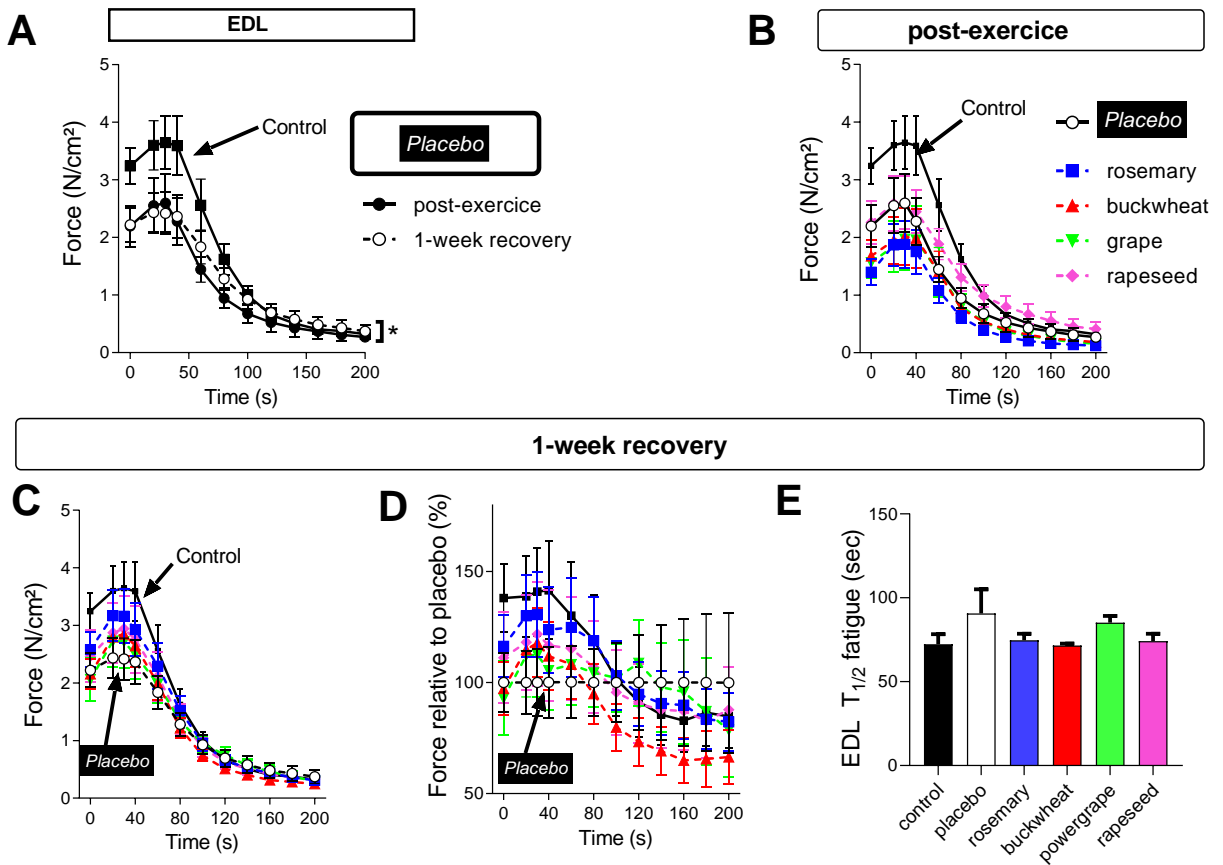

**Figure S3. Effects of the 4 different natural extracts on the EDL fatigability after exercise and recovery.** **(A)** Test of fatigue *in vitro* on soleus muscles in sedentary rats (control, black square), placebo post-exercise (black circle) and placebo one-week recovery (open circle) groups. **(B)** Effects of Rosemary (blue square), Buckwheat (red triangle), Powergrape (green triangle) and Rapeseed (pink diamond) on *in vitro* post-exercise muscle fatigue test in soleus compared with placebo (open circle) and controls (black square). **(C-E)** Effects of the natural extracts on the *in vitro* muscle fatigue test one week after exercise compared with placebo (open circle) and controls (black square). **(D)** Muscle fatigue was also expressed relative to the level of force of the placebo group at each time point. **(E)** Time to 1/2 loss of maximum strength during fatigue test in the different groups after one week of recovery. ( $n=7-13$  animals per group). \* $P < 0.05$  placebo vs Control, Rosemary, Buckwheat, Powergrape and Rapeseed groups.

**Table S1:** ECG parameters before, 30-min after and 7 days after intense exercise in presence or absence of antioxidant naturel extracts.

|             |       | PR duration (ms) |          |          | QRS duration (ms) |          |          |
|-------------|-------|------------------|----------|----------|-------------------|----------|----------|
|             |       | Base             | Post-Ex  | Recov    | Base              | Post-Ex  | Recov    |
| placebo     | (n=8) | 43.7±2.9         | 42.0±2.6 | 44.3±3.4 | 22.1±2.2          | 22.7±1.8 | 23.0±2.7 |
| rosemary    | (n=8) | 45.0±2.9         | 44.1±4.4 | 45.4±4.0 | 24.9±1.7          | 22.7±2.4 | 24.3±3.0 |
| bucklewheat | (n=9) | 43.0±1.6         | 41.7±2.2 | 42.2±2.2 | 22.0±2.1          | 20.2±2.0 | 22.8±2.0 |
| powergrape  | (n=7) | 44.2±3.0         | 43.1±3.5 | 44.0±3.0 | 21.8±2.6          | 19.9±4.1 | 23.5±2.5 |
| rapeseed    | (n=8) | 45.8±1.5         | 44.0±3.4 | 45.2±2.5 | 22.6±2.1          | 21.6±3.7 | 23.4±1.6 |
